# Supplementary material for: Pitch-tunable pillar arrays for high-throughput culture and immunohistological analysis of tumor spheroids
Source: Royal Society of Chemistry journal article supplement (doi:10.1039/c7ra09090k), 2018-01-01
Supplement: c7ra09090k4.pdf [file c7ra09090k4.pdf]

1 **Supplementary Figure 1.** Limited detection of fluorescence signals in the intact tumor  
2 spheroids by confocal imaging. Optical section images of tumor spheroids stained for type I  
3 collagen in PANC-1 spheroids (A) and Ki-67 in HT-29 spheroids (B) with or without tissue  
4 clearing process (CLARITY). Signals of type I collagen (A) and Ki-67 (B) were absent in the  
5 central region of the spheroids without tissue clearing, indicating limited penetration of  
6 antibodies in the immunofluorescence staining. Nuclear DAPI signal was not detected in the  
7 central region of PANC-1 spheroids (A), but detected in HT-29 spheroids following  
8 refractive index matching (B). Spheroids were cultured either in mini-pillar array (PANC-1)  
9 for 7 days or in ULA 96-well plates (HT-29) for 6 days and subjected to immunofluorescence  
10 staining with or without tissue clearing procedure and subsequent confocal imaging. Images  
11 were obtained by optical sectioning at 20  $\mu\text{m}$  increments from the surface to the core of  
12 spheroids along the z-axis. Scale bars, 50  $\mu\text{m}$ .

**Supplementary Figure 1.**

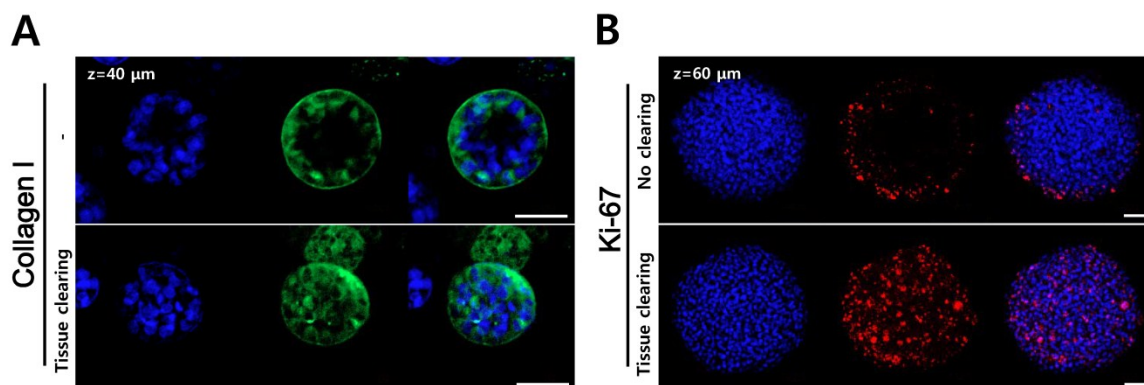

13

14 **Supplementary video 1.** Video showing experimental procedures for high-throughput, high-  
15 content histological analysis of 3D tumor spheroids by pillar array. The steps included are;  
16 assembly of the pillars in the pillar holder, loading and culturing cancer cells in 3D using 96-

1 well plates, drug exposure, embedding spheroid arrays in the OCT solution, sectioning the  
2 OCT block, and conducting immunohistochemical staining.

3 **Supplementary video 2.** A 3D reconstruction image of HT-29 spheroids following exposure  
4 to 100  $\mu\text{M}$  of DOX for 20 min. Serial images were obtained by optical sectioning at 9  $\mu\text{m}$   
5 increments over 351  $\mu\text{m}$  distance from the bottom to the center of an alginate cap along the z-  
6 axis; images of the region beyond this distance was not acquired due to optical attenuation.  
7 Intranuclear accumulation of DOX visualized by fluorescence imaging demonstrated 3D  
8 structure of HT-29 spheroids cultured in alginate matrix on pillar array. Approximate sizes of  
9 spheroids appeared to be  $113 \pm 25 \mu\text{m}$ .

10

11
